# Supplementary material
Source: PubMed Central journal article supplement (PMC8552114)
Supplement: jamadermatol-e214143-s001.pdf [file jamadermatol-e214143-s001.pdf]

## Supplemental Online Content

Afarideh M, Sartori-Valinotti JC, Tollefson MM. Association of sun-protective behaviors with bone mineral density and osteoporotic bone fractures in US adults. *JAMA Dermatol*. Published online October 27, 2021. doi:10.1001/jamadermatol.2021.4143

**eTable.** Association of sun-protective behaviors with BMD z-scores in NHANES 2017-2018.

This supplemental material has been provided by the authors to give readers additional information about their work.

Baseline and multivariate design-based survey linear regression models demonstrating the association of different sun-protective techniques and BMD z-scores at minor anatomic sites are shown in the **eTable**. While each individual sun-protective modality was associated with significant decreases in several site-specific and total BMD z-scores in baseline models, these associations largely faded following the multivariate adjustments for potential confounders. Weak association of *moderate* shade stay with increased total femur BMD (0.144 [−0.038 to 0.327],  $p=0.050$ ) remained significant in the multivariate linear regression.

**eTable.** Association of sun-protective behaviors with BMD z-scores in NHANES 2017-2018.

|                                     | Sun protective behaviors    |       |                              |       |                             |       |
|-------------------------------------|-----------------------------|-------|------------------------------|-------|-----------------------------|-------|
|                                     | Staying in the shade        |       | Wearing long sleeves         |       | Using sunscreen             |       |
|                                     | Estimate (95% CI)           | P     | Estimate (95% CI)            | P     | Estimate (95% CI)           | P     |
| <b>Upper body BMD z-scores</b>      |                             |       |                              |       |                             |       |
| <b>Head</b>                         |                             |       |                              |       |                             |       |
| <i>Unadjusted Models</i>            |                             | 0.411 |                              | 0.137 |                             | 0.293 |
| <b>Rare</b>                         | Reference                   |       | Reference                    |       | Reference                   |       |
| <b>Moderate</b>                     | −0.55<br>(−0.151 to 0.041)  |       | −0.132<br>(−0.260 to −0.003) |       | −0.066<br>(−0.166 to 0.034) |       |
| <b>Frequent</b>                     | 0.16<br>(−0.104 to 0.135)   |       | −0.094<br>(−0.255 to 0.068)  |       | 0.30<br>(−0.074 to 0.135)   |       |
| <i>Multivariate Adjusted Model*</i> |                             | 0.180 |                              | 0.540 |                             | 0.145 |
| <b>Rare</b>                         | Reference                   |       | Reference                    |       | Reference                   |       |
| <b>Moderate</b>                     | −0.064<br>(−0.226 to 0.099) |       | −0.087<br>(−0.247 to 0.073)  |       | −0.240<br>(−0.498 to 0.018) |       |
| <b>Frequent</b>                     | −0.173<br>(−0.354 to 0.009) |       | −0.010<br>(−0.239 to 0.218)  |       | −0.120<br>(−0.270 to 0.030) |       |
| <b>Left ribs</b>                    |                             |       |                              |       |                             |       |

|                                     |                              |              |                              |       |                              |              |
|-------------------------------------|------------------------------|--------------|------------------------------|-------|------------------------------|--------------|
| <i>Unadjusted Models</i>            |                              | <b>0.012</b> |                              | 0.111 |                              | <b>0.002</b> |
| <b>Rare</b>                         | Reference                    |              | Reference                    |       | Reference                    |              |
| <b>Moderate</b>                     | -0.119<br>(-0.325 to 0.086)  |              | -0.076<br>(-0.173 to 0.022)  |       | -0.218<br>(-0.350 to -0.085) |              |
| <b>Frequent</b>                     | -0.252<br>(-0.445 to -0.060) |              | -0.162<br>(-0.317 to -0.008) |       | -0.269<br>(-0.401 to -0.138) |              |
| <i>Multivariate Adjusted Model*</i> |                              | 0.619        |                              | 0.510 |                              | 0.360        |
| <b>Rare</b>                         | Reference                    |              | Reference                    |       | Reference                    |              |
| <b>Moderate</b>                     | -0.064<br>(-0.294 to 0.166)  |              | 0.033<br>(-0.196 to 0.263)   |       | -0.160<br>(-0.414 to 0.094)  |              |
| <b>Frequent</b>                     | -0.138<br>(-0.424 to 0.148)  |              | -0.097<br>(-0.336 to 0.142)  |       | 0.005<br>(-0.297 to 0.307)   |              |
| <b>Right ribs</b>                   |                              |              |                              |       |                              |              |
| <i>Unadjusted Models</i>            |                              | 0.073        |                              | 0.184 |                              | <b>0.001</b> |
| <b>Rare</b>                         | Reference                    |              | Reference                    |       | Reference                    |              |
| <b>Moderate</b>                     | -0.119<br>(-0.309 to 0.071)  |              | -0.054<br>(-0.155 to 0.046)  |       | -0.195<br>(-0.329 to -0.061) |              |
| <b>Frequent</b>                     | -0.221<br>(-0.423 to -0.019) |              | -0.158<br>(-0.345 to 0.029)  |       | -0.298<br>(-0.425 to -0.171) |              |
| <i>Multivariate Adjusted Model*</i> |                              | 0.424        |                              | 0.668 |                              | 0.345        |
| <b>Rare</b>                         | Reference                    |              | Reference                    |       | Reference                    |              |
| <b>Moderate</b>                     | -0.100<br>(-0.269 to 0.069)  |              | 0.049<br>(-0.174 to 0.272)   |       | -0.169<br>(-0.422 to 0.085)  |              |
| <b>Frequent</b>                     | -0.170<br>(-0.440 to 0.100)  |              | -0.086<br>(-0.370 to 0.197)  |       | -0.160<br>(-0.469 to 0.149)  |              |
| <i>Unadjusted Models</i>            |                              |              |                              |       |                              |              |
| <b>Trunk</b>                        |                              | <b>0.008</b> |                              | 0.172 |                              | <b>0.002</b> |
| <b>Rare</b>                         | Reference                    |              | Reference                    |       | Reference                    |              |
| <b>Moderate</b>                     | -0.137<br>(-0.311 to 0.038)  |              | -0.077<br>(-0.189 to 0.035)  |       | -0.126<br>(-0.228 to -0.023) |              |
| <b>Frequent</b>                     | -0.261<br>(-0.443 to -0.079) |              | -0.136<br>(-0.276 to 0.005)  |       | -0.114<br>(-0.192 to -0.035) |              |
| <i>Multivariate Adjusted Model*</i> |                              | 0.389        |                              | 0.994 |                              | 0.169        |

|                                     |                              |       |                             |       |                              |              |
|-------------------------------------|------------------------------|-------|-----------------------------|-------|------------------------------|--------------|
| <b>Rare</b>                         | Reference                    |       | Reference                   |       | Reference                    |              |
| <b>Moderate</b>                     | -0.072<br>(-0.246 to 0.102)  |       | -0.006<br>(-0.226 to 0.214) |       | -0.059<br>(-0.311 to 0.193)  |              |
| <b>Frequent</b>                     | -0.158<br>(-0.387 to 0.071)  |       | 0.009<br>(-0.261 to 0.278)  |       | -0.220<br>(-0.448 to 0.008)  |              |
| <b>Lower body BMD z-scores</b>      |                              |       |                             |       |                              |              |
| <b>Pelvis</b>                       |                              |       |                             |       |                              |              |
| <i>Unadjusted Models</i>            |                              | 0.061 |                             | 0.301 |                              | <b>0.032</b> |
| <b>Rare</b>                         | Reference                    |       | Reference                   |       | Reference                    |              |
| <b>Moderate</b>                     | -0.132<br>(-0.298 to 0.034)  |       | -0.052<br>(-0.196 to 0.092) |       | -0.072<br>(-0.179 to 0.035)  |              |
| <b>Frequent</b>                     | -0.193<br>(-0.363 to -0.022) |       | -0.127<br>(-0.304 to 0.050) |       | -0.085<br>(-0.151 to -0.018) |              |
| <i>Multivariate Adjusted Model*</i> |                              | 0.782 |                             | 0.738 |                              | 0.347        |
| <b>Rare</b>                         | Reference                    |       | Reference                   |       | Reference                    |              |
| <b>Moderate</b>                     | -0.033<br>(-0.236 to 0.170)  |       | 0.043<br>(-0.181 to 0.266)  |       | -0.153<br>(-0.361 to 0.056)  |              |
| <b>Frequent</b>                     | -0.069<br>(-0.275 to 0.136)  |       | 0.100<br>(-0.167 to 0.368)  |       | -0.085<br>(-0.293 to 0.123)  |              |
| <b>Trochanter</b>                   |                              |       |                             |       |                              |              |
| <i>Unadjusted Models</i>            |                              | 0.492 |                             | 0.332 |                              | 0.523        |
| <b>Rare</b>                         | Reference                    |       | Reference                   |       | Reference                    |              |
| <b>Moderate</b>                     | -0.070<br>(-0.275 to 0.135)  |       | -0.232<br>(-0.559 to 0.095) |       | -0.073<br>(-0.353 to 0.206)  |              |
| <b>Frequent</b>                     | -0.164<br>(-0.441 to 0.113)  |       | -0.094<br>(-0.441 to 0.253) |       | -0.119<br>(-0.336 to 0.098)  |              |
| <i>Multivariate Adjusted Model*</i> |                              | 0.103 |                             | 0.996 |                              | 0.905        |
| <b>Rare</b>                         | Reference                    |       | Reference                   |       | Reference                    |              |
| <b>Moderate</b>                     | 0.063<br>(-0.145 to 0.270)   |       | 0.018<br>(-0.393 to 0.429)  |       | 0.047<br>(-0.208 to 0.301)   |              |
| <b>Frequent</b>                     | -0.226<br>(-0.618 to 0.166)  |       | 0.008<br>(-0.357 to 0.373)  |       | -0.047<br>(-0.444 to 0.350)  |              |
| <b>Total femur</b>                  |                              |       |                             |       |                              |              |

|                                     |                             |              |                             |       |                             |       |
|-------------------------------------|-----------------------------|--------------|-----------------------------|-------|-----------------------------|-------|
| <i>Unadjusted Models</i>            |                             | 0.433        |                             | 0.586 |                             | 0.309 |
| <b>Rare</b>                         | Reference                   |              | Reference                   |       | Reference                   |       |
| <b>Moderate</b>                     | -0.013<br>(-0.268 to 0.241) |              | -0.155<br>(-0.463 to 0.154) |       | -0.109<br>(-0.464 to 0.246) |       |
| <b>Frequent</b>                     | -0.171<br>(-0.467 to 0.126) |              | -0.068<br>(-0.485 to 0.350) |       | -0.150<br>(-0.344 to 0.045) |       |
| <i>Multivariate Adjusted Model*</i> |                             | <b>0.050</b> |                             | 0.769 |                             | 0.985 |
| <b>Rare</b>                         | Reference                   |              | Reference                   |       | Reference                   |       |
| <b>Moderate</b>                     | 0.144<br>(-0.038 to 0.327)  |              | 0.143<br>(-0.259 to 0.545)  |       | -0.020<br>(-0.365 to 0.324) |       |
| <b>Frequent</b>                     | -0.109<br>(-0.477 to 0.258) |              | 0.062<br>(-0.275 to 0.399)  |       | 0.021<br>(-0.434 to 0.475)  |       |

**CI** Confidence Interval, **BMD** Bone Mineral Density.

\* adjusted for gender, age, race/ethnicity, education level, country of birth, annual household income, milk consumption, current smoker status, body mass index, total serum calcium, serum alkaline phosphatase, and MET-minutes physical activity scores.
